# Supplementary material
Source: Springer Nature journal article supplement (https://www.springermedizin.de/resource/supplementary/12936_2011_2077_MOESM6_ESM.pdf/9543396)

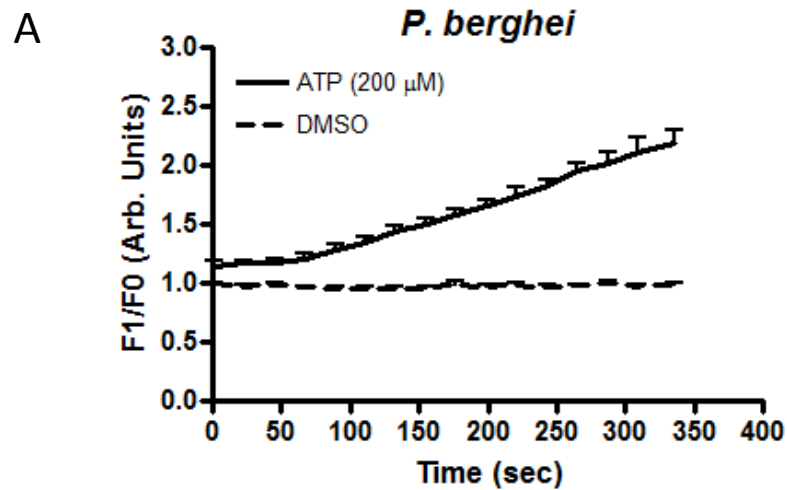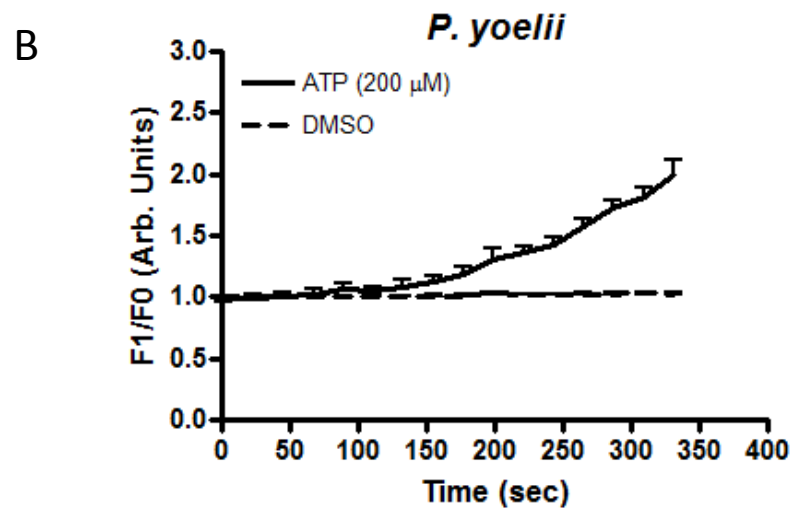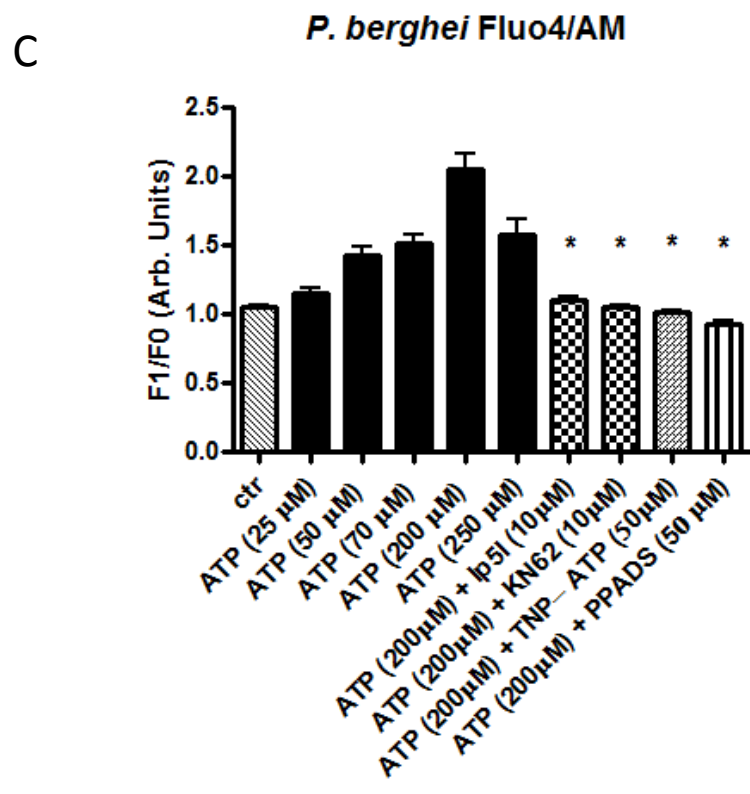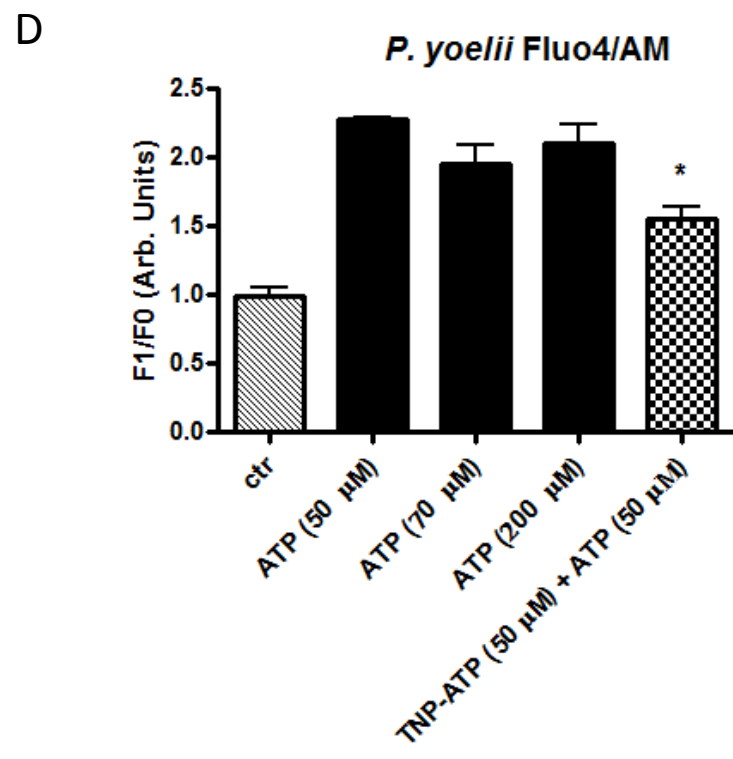

Supplement: MOESM6 [file 9543396]
